# Supplementary material
Source: PubMed Central journal article supplement (PMC4134509)
Supplement: NIHMS607164-supplement-02.pdf [file NIHMS607164-supplement-02.pdf]

**Table S1**

| Subject | Age  | Gender | Handedness | # Electrodes | # Trials | % Object Visible | % Correct, Whole | % Correct, Partial |
|---------|------|--------|------------|--------------|----------|------------------|------------------|--------------------|
| 1       | 25   | M      | R          | 72           | 2760     | 11               | 96               | 82                 |
| 2       | 18   | M      | R          | 64           | 2840     | 18               | 98               | 92                 |
| 3       | 12   | F      | R          | 144          | 1000     | 19               | 81               | 80                 |
| 4       | 21   | M      | R          | 72           | 3680     | 9                | 99               | 70                 |
| 5       | 9    | F      | R          | 104          | 720      | 9                | 99               | 77                 |
| 6       | 27   | M      | R          | 64           | 3760     | 9                | 97               | 79                 |
| *7      | 17   | F      | R          | 120          | 760      | 17               | 98               | 84                 |
| 8       | 15   | M      | R          | 109          | 200      | 11               | 95               | 73                 |
| 9       | 40   | M      | R          | 44           | 1640     | 15               | 96               | 78                 |
| 10      | 8    | F      | R          | 108          | 240      | 25               | 96               | 88                 |
| 11      | 16   | M      | R          | 124          | 600      | 25               | 85               | 92                 |
| *12     | 16   | F      | R          | 104          | 4440     | 13               | 98               | 82                 |
| 13      | 23   | F      | R          | 89           | 4000     | 21               | 99               | 73                 |
| 14      | 25   | M      | R          | 105          | 920      | 27               | 91               | 69                 |
| 15      | 16   | M      | R          | 80           | 865      | 21               | 97               | 68                 |
| 16      | 16   | F      | R          | 108          | 400      | 27               | 98               | 76                 |
| 17      | 12   | M      | L          | 92           | 1185     | 21               | 94               | 75                 |
| 18      | 22.0 | M      | R          | 96           | 1120     | 24               | 99               | 80                 |

\* denotes subjects with eye-tracking

**Table S2**

| Subject Location            | Talairach Coordinates  | Latency, Whole (ms) | Latency Partial, (ms) | Experiment |
|-----------------------------|------------------------|---------------------|-----------------------|------------|
| 1 Fusiform Gyrus            | [ 41.8, -42.6, -20.7 ] | 100                 | 320                   | Main       |
| 2 Inferior Occipital Gyrus  | [42.5, -86.0, -5.3]    | 108                 | 229                   | Main       |
| 2 Middle Temporal           | [53.1, -73.7, 7.3]     | 143                 | 300                   | Main       |
| 2 Occipital Pole            | [26.3, -84.7, -16.9]   | 167                 | 384                   | Main       |
| 2 Inferior Occipital Gyrus  | [35.9, -82.8, -14.5]   | 154                 | 349                   | Main       |
| 2 Inferior Occipital Gyrus  | [47.7, -80.4, -10.4]   | 175                 | 249                   | Main       |
| 2 Inferior Occipital Gyrus  | [48.7, -74.5, -5.1]    | 139                 | 198                   | Main       |
| 2 Middle Temporal           | [56.2, -69.0, 2.1]     | 118                 | 272                   | Main       |
| 2 Parahippocampal Gyrus     | [30.5, -33.8, -19.4]   | 185                 | 244                   | Main       |
| 2 Fusiform Gyrus            | [39.2, -40.0, -19.8]   | 209                 | 331                   | Main       |
| 2 Inferior Temporal Gyrus   | [50.1 -45.3 -20.5]     | 191                 | 314                   | Main       |
| 2 Inferior Temporal Gyrus   | [55.6, -48.4, -14.1]   | 215                 | 283                   | Main       |
| 2 Parahippocampal Gyrus     | [35.7, -26.6, -23.0]   | 138                 | 268                   | Main       |
| 4 Fusiform Gyrus            | [-32.2, -45.6, -16.1]  | 83                  | 219                   | Main       |
| 4 Fusiform Gyrus            | [-30.2, -40.7, -32.7]  | 132                 | 257                   | Main       |
| 4 Fusiform Gyrus            | [-21.5, -58.6, -12.6]  | 163                 | 303                   | Main       |
| 4 Fusiform Gyrus            | [-30.7, -53.1, -16.4]  | 160                 | 211                   | Main       |
| 7 Parahippocampal Gyrus     | [-26.2 -23.0 -27.5]    | 162                 | 236                   | Main       |
| 7 Temporal Pole             | [-35.4, -18.3, -34.8]  | 160                 | 201                   | Main       |
| 7 Middle Occipital Gyrus    | [-45.2 -87.9 -6.9]     | 259                 | 306                   | Main       |
| 12 Middle Temporal          | [-58.7 -67.0 15.5]     | 136                 | 288                   | Main       |
| 12 Fusiform Gyrus           | [-42.0 -42.3 -23.2]    | 122                 | 222                   | Main       |
| 13 Fusiform Gyrus           | [-33.7 -43.3 -19.0]    | 185                 | 255                   | Variant    |
| 13 Inferior Temporal Gyrus  | [-49.0 -46.6 -18.7]    | 132                 | 279                   | Variant    |
| 15 Inferior Occipital Gyrus | [-45.6, -73.0, -10.1]  | 241                 | 235                   | Variant    |
| 15 Fusiform Gyrus           | [-41.9, -62.6, -15.8]  | 106                 | 181                   | Variant    |
| 15 Fusiform Gyrus           | [-26.3, -44.7, -15.8]  | 327                 | 379                   | Variant    |
| 17 Fusiform Gyrus           | [-27.2 -74.1 -17.3]    | 166                 | 221                   | Variant    |
| 18 Fusiform Gyrus           | [-40.2 -40.7 -26.9]    | 264                 | 238                   | Variant    |
| 18 Inferior Occipital Gyrus | [-43.7 -80.5 -0.7]     | 108                 | 174                   | Variant    |
